# Supplementary material for: Exploring Less Invasive Visual Surveys to Assess the Spatial Distribution of Endangered Mediterranean Trout Population in a Small Intermittent Stream
Source: MDPI journal article supplement (doi:10.3390/biology12071000), 2023-07-13
Supplement: s1 [file s1]

## Supplementary Materials

**Table S1.** Descriptive statistics of pools characteristics surveyed in Piras stream during the two different flow regimes. K-W test (\*p< 0.05, \*\*p< 0.01, \*\*\*p< 0.001).

| Variables                                  |                                  | High flow regime (HFR) |        |           | Low flow regime (LFR) |        |            |
|--------------------------------------------|----------------------------------|------------------------|--------|-----------|-----------------------|--------|------------|
|                                            |                                  | Mean±SE                | Median | Range     | Mean±SE               | Median | Range      |
| Pool size                                  | Pool_Length (m) (*)              | 7.92±0.48              | 8      | 3-17      | 6.77±0.49             | 7      | 03-17      |
|                                            | Pool_Width (m) (**)              | 4.34±0.23              | 4      | 1.5-9     | 3.49±0.26             | 3.3    | 0.1-ago    |
|                                            | Depth (m)                        | 0.84±0.06              | 0.7    | 0.3-1.8   | 0.67±0.06             | 0.6    | 0.25-1.74  |
|                                            | Volume (m <sup>3</sup> ) (*)     | 35.89±5.32             | 16.9   | 2.8-140   | 21.73±3.88            | 9      | 1.75-93.26 |
| Chemical-Physical characteristics of water | T_H <sub>2</sub> O (°C) (***)    | 9.83±0.10              | 9.5    | 8.9-10.8  | 16.35±0.09            | 16.3   | 15-18      |
|                                            | O <sub>2</sub> _mgl (mg/l) (***) | 10.54±0.03             | 10.6   | 10.2-10.9 | 8.27±0.17             | 8.6    | 4-9.2      |
|                                            | Turbidity (NTU) (***)            | 0.33±0.02              | 0.3    | 0.1-0.9   | 0.86±0.04             | 0.8    | 0.4-1.4    |
| Substrate                                  | Bedrock (%)                      | 15.53±2.9              | 10     | 0-80      | 16.28±3.25            | 10     | 0-90       |
|                                            | Boulder (%)                      | 32.02±3.57             | 30     | 0-80      | 27.43±3.87            | 20     | 0-80       |
|                                            | Cobble (%)                       | 32.23±3.01             | 30     | 0-85      | 35.12±3.45            | 30     | 0-85       |
|                                            | Gravel (%)                       | 17.44±2.32             | 10     | 0-55      | 17.82±2.59            | 10     | 0-55       |
|                                            | Sand (%)                         | 2.76±0.89              | 0      | 0-30      | 3.33±1.06             | 0      | 0-30       |
|                                            | Silt (%)                         | 0                      | 0      | 0         | 0                     | 0      | 0          |
| Organic cover                              | Emergent_Macrophytes (%)         | 0.95±0.39              | 0      | 0-10      | 0.51±0.30             | 0      | 0-10       |
|                                            | Submerged_Macrophytes (%)        | 1.06±2.32              | 0      | 0-10      | 1.92±0.81             | 0      | 0-20       |
|                                            | Periphyton (%) (***)             | 69.36±3.65             | 75     | 10-100    | 50.89±4.40            | 60     | 5-100      |
|                                            | Green_Algae (%)                  | 7.34±2.63              | 0      | 0-80      | 12.05±3.44            | 0      | 0-75       |
|                                            | Roots (%)                        | 9.89±1.23              | 10     | 0-30      | 8.59±1.23             | 10     | 0-30       |
|                                            | Riparian_vegetation (%)          | 5.35±0.96              | 5      | 0-35      | 5.52±1.05             | 0      | 0-20       |
|                                            | XYLAL (%) (***)                  | 4.57±1.29              | 0      | 0-50      | 11.41±1.57            | 10     | 0-40       |
|                                            | FPOM (%) (***)                   | 1.38±0.66              | 0      | 0-25      | 9.61±2.02             | 5      | 0-60       |

**Table S2.** List of variables measured for each pool.

|                                            | Variables             | Category   | Description and units                                                              |
|--------------------------------------------|-----------------------|------------|------------------------------------------------------------------------------------|
| Sampling Seasons                           | Flow_regime           | Factor     | Highest and lowest flows regime (HIGH and LOW)                                     |
| Pool size                                  | Pool_Length           | Continuous | Pool Length (m)                                                                    |
|                                            | Pool_Width            | Continuous | Average pool width (m)                                                             |
|                                            | Depth                 | Continuous | Maximum value of pool depth (m)                                                    |
|                                            | Volume                | Continuous | Pool volume [length (m) × average width (m) × average depth (m)] (m <sup>3</sup> ) |
| Chimical-Physical characteristics of water | T_H2O                 | Continuous | Average water temperature recorded during the samplings (°C)                       |
|                                            | O2_mgl                | Continuous | Oxygen concentration recorded during the samplings (O2, mg l <sup>-1</sup> )       |
|                                            | Turbulence_rate       | Factor     | Water turbulence: Low (LTR), Medium (MTR) and High(HTR)                            |
|                                            | Turbidity             | Continuous | Water nephelometric turbidity recorded during the samplings (NTU)                  |
| Substrate                                  | Bedrock               | Continuous | Exposed bedrock along the streambed (%)                                            |
|                                            | Boulder               | Continuous | Boulder (more than 304.0 mm) (%)                                                   |
|                                            | Cobble                | Continuous | Cobble (76.1–304.0 mm) (%)                                                         |
|                                            | Gravel                | Continuous | Gravel (4.8–76.0 mm) (%)                                                           |
|                                            | Sand                  | Continuous | Sand (0.8–4.7 mm) (%)                                                              |
|                                            | Silt                  | Continuous | Silt (particle size less than 0.8 mm) (%)                                          |
| Organic cover                              | Emergent_Macrophytes  | Continuous | Erbaceus macrophytes (%)                                                           |
|                                            | Submerged_Macrophytes | Continuous | Subaqueous macrophytes partly above the water or completely under-water (%)        |
|                                            | Periphyton            | Continuous | Microalgae that cover the substrate of streambad (%)                               |
|                                            | Green_Algae           | Continuous | Filamentous green algae (%)                                                        |
|                                            | Roots                 | Continuous | Roots of the riparian vegetation (%)                                               |
|                                            | Riparian_vegetation   | Continuous | Vegetation at riverside extending at least 20 cm into the channel (%)              |
|                                            | XYLAL                 | Continuous | Dead wood, non-living tree trunks and branches (%)                                 |
|                                            | FPOM                  | Continuous | Fine particular organic material (%)                                               |

**Table S3.** Result of collinearity test.

| Selected variables    | Variance inflation factor (VIF) |
|-----------------------|---------------------------------|
| Volume                | 1.068305                        |
| pH                    | 1.462694                        |
| Turbidity             | 1.629437                        |
| Green_Algae           | 1.157672                        |
| Submerged_Macrophytes | 1.303739                        |
| Roots                 | 1.207014                        |
| Riparian_vegetation   | 1.240164                        |
